# Supplementary material for: Comprehensive analysis of immunoglobulin expression in the mouse brain from embryonic to adult stages
Source: J Neuroinflammation. 2025 Jun 9;22:153. doi: 10.1186/s12974-025-03457-9 (PMC12147291; doi:10.1186/s12974-025-03457-9)
Supplement: Supplementary file 1 — Supplementary Material 1 [file 12974_2025_3457_MOESM1_ESM.xlsx]

## Sheet: Sup Table1
chain	region	gene	Blood	Choroid plexus	Ependymal	Fibroblast	Glioblast	Immune	Neuroblast	Neuron	Olfactory ensheathing cell	Oligodendrocyte	Pineal gland	Radial glia	Schwann cell	Subcommissural organ	Vascular
total cell #			6272	571	373	3664	10170	2715	10864	53639	260	1917	70	2274	262	83	3941
heavy chain	constant region	Igha	0	0	0	0	0	0	0	0	0	0	0	0	0	0	0
heavy chain	constant region	Ighd	0	1	0	0	2	48	0	2	0	1	0	0	0	0	0
heavy chain	constant region	Ighe	0	0	0	0	0	0	0	1	0	0	0	0	0	0	1
heavy chain	constant region	Ighg1	0	0	0	1	0	0	0	0	0	0	0	0	0	0	0
heavy chain	constant region	Ighg2b	0	0	0	0	0	0	0	0	0	0	0	0	0	0	0
heavy chain	constant region	Ighg2c	0	0	0	0	0	0	0	0	0	0	0	0	0	0	0
heavy chain	constant region	Ighg3	0	0	0	0	0	0	0	0	0	0	0	0	0	0	0
heavy chain	constant region	Ighm	2	1	1	2	6	1305	5	12	0	2	0	1	0	0	4
heavy chain	V region	Ighv1-1	0	0	0	0	0	0	0	0	0	0	0	0	0	0	0
heavy chain	V region	Ighv1-10	0	0	0	0	0	0	0	0	0	0	0	0	0	0	0
heavy chain	V region	Ighv1-11	0	0	0	0	0	0	0	0	0	0	0	0	0	0	0
heavy chain	V region	Ighv1-12	0	0	0	0	0	0	0	0	0	0	0	0	0	0	0
heavy chain	V region	Ighv1-13	0	0	0	0	0	0	0	0	0	0	0	0	0	0	0
heavy chain	V region	Ighv1-13-1	0	0	0	0	0	0	0	0	0	0	0	0	0	0	0
heavy chain	V region	Ighv1-14	0	0	0	0	0	0	0	0	0	0	0	0	0	0	0
heavy chain	V region	Ighv1-15	0	0	0	0	0	0	0	0	0	0	0	0	0	0	0
heavy chain	V region	Ighv1-16	0	0	0	0	0	0	0	0	0	0	0	0	0	0	0
heavy chain	V region	Ighv1-17	0	0	0	0	0	0	0	0	0	0	0	0	0	0	0
heavy chain	V region	Ighv1-17-1	0	0	0	0	0	0	0	0	0	0	0	0	0	0	0
heavy chain	V region	Ighv1-18	0	0	0	0	0	0	0	0	0	0	0	0	0	0	0
heavy chain	V region	Ighv1-19	0	0	0	0	0	0	0	0	0	0	0	0	0	0	0
heavy chain	V region	Ighv1-19-1	0	0	0	0	0	0	0	0	0	0	0	0	0	0	0
heavy chain	V region	Ighv1-2	0	0	0	0	0	0	0	0	0	0	0	0	0	0	0
heavy chain	V region	Ighv1-20	0	0	0	0	0	1	0	0	0	0	0	0	0	0	0
heavy chain	V region	Ighv1-21	0	0	0	0	0	0	0	0	0	0	0	0	0	0	0
heavy chain	V region	Ighv1-21-1	0	0	0	0	0	0	0	0	0	0	0	0	0	0	0
heavy chain	V region	Ighv1-22	0	0	0	0	0	0	0	0	0	0	0	0	0	0	0
heavy chain	V region	Ighv1-23	0	0	0	0	0	0	0	0	0	0	0	0	0	0	0
heavy chain	V region	Ighv1-24	0	0	0	0	0	0	0	0	0	0	0	0	0	0	0
heavy chain	V region	Ighv1-25	0	0	0	0	0	0	0	0	0	0	0	0	0	0	0
heavy chain	V region	Ighv1-26	0	0	0	0	0	0	0	0	0	0	0	0	0	0	0
heavy chain	V region	Ighv1-27	0	0	0	0	0	0	0	0	0	0	0	0	0	0	0
heavy chain	V region	Ighv1-28	0	0	0	0	0	0	0	0	0	0	0	0	0	0	0
heavy chain	V region	Ighv1-29	0	0	0	0	0	0	0	0	0	0	0	0	0	0	0
heavy chain	V region	Ighv1-3	0	0	0	0	0	0	0	0	0	0	0	0	0	0	0
heavy chain	V region	Ighv1-30	0	0	0	0	0	0	0	0	0	0	0	0	0	0	0
heavy chain	V region	Ighv1-31	0	0	0	0	0	0	0	0	0	0	0	0	0	0	0
heavy chain	V region	Ighv1-32	0	0	0	0	0	0	0	0	0	0	0	0	0	0	0
heavy chain	V region	Ighv1-33	0	0	0	0	0	0	0	0	0	0	0	0	0	0	0
heavy chain	V region	Ighv1-34	0	0	0	0	0	0	0	0	0	0	0	0	0	0	0
heavy chain	V region	Ighv1-35	0	0	0	0	0	0	0	0	0	0	0	0	0	0	0
heavy chain	V region	Ighv1-36	0	0	0	0	0	0	0	0	0	0	0	0	0	0	0
heavy chain	V region	Ighv1-37	0	0	0	0	0	0	0	0	0	0	0	0	0	0	0
heavy chain	V region	Ighv1-38	0	0	0	0	0	0	0	0	0	0	0	0	0	0	0
heavy chain	V region	Ighv1-39	0	0	0	0	0	0	0	0	0	0	0	0	0	0	0
heavy chain	V region	Ighv1-4	0	0	0	0	0	0	0	0	0	0	0	0	0	0	0
heavy chain	V region	Ighv1-40	0	0	0	0	0	0	0	0	0	0	0	0	0	0	0
heavy chain	V region	Ighv1-41	0	0	0	0	0	0	0	0	0	0	0	0	0	0	0
heavy chain	V region	Ighv1-42	0	0	0	0	0	0	0	0	0	0	0	0	0	0	0
heavy chain	V region	Ighv1-43	0	0	0	0	0	0	0	0	0	0	0	0	0	0	0
heavy chain	V region	Ighv1-44	0	0	0	0	0	0	0	0	0	0	0	0	0	0	0
heavy chain	V region	Ighv1-45	0	0	0	0	0	0	0	0	0	0	0	0	0	0	0
heavy chain	V region	Ighv1-46	0	0	0	0	0	0	0	0	0	0	0	0	0	0	0
heavy chain	V region	Ighv1-47	0	0	0	0	0	0	0	0	0	0	0	0	0	0	0
heavy chain	V region	Ighv1-48	0	0	0	0	0	0	0	0	0	0	0	0	0	0	0
heavy chain	V region	Ighv1-49	0	0	0	0	0	0	0	0	0	0	0	0	0	0	0
heavy chain	V region	Ighv1-5	0	0	0	0	0	0	0	0	0	0	0	0	0	0	0
heavy chain	V region	Ighv1-50	0	0	0	0	0	0	0	0	0	0	0	0	0	0	0
heavy chain	V region	Ighv1-51	0	0	0	0	0	0	0	0	0	0	0	0	0	0	0
heavy chain	V region	Ighv1-52	0	0	0	0	0	0	0	0	0	0	0	0	0	0	0
heavy chain	V region	Ighv1-53	0	0	0	0	0	0	0	0	0	0	0	0	0	0	0
heavy chain	V region	Ighv1-54	0	0	0	0	0	0	0	0	0	0	0	0	0	0	0
heavy chain	V region	Ighv1-55	0	0	0	0	0	0	0	0	0	0	0	0	0	0	0
heavy chain	V region	Ighv1-56	0	0	0	0	0	0	0	0	0	0	0	0	0	0	0
heavy chain	V region	Ighv1-57	0	0	0	0	0	0	0	0	0	0	0	0	0	0	0
heavy chain	V region	Ighv1-58	0	0	0	0	0	0	0	0	0	0	0	0	0	0	0
heavy chain	V region	Ighv1-59	0	0	0	0	0	1	0	0	0	0	0	0	0	0	0
heavy chain	V region	Ighv1-6	0	0	0	0	0	0	0	0	0	0	0	0	0	0	0
heavy chain	V region	Ighv1-60	0	0	0	0	0	0	0	0	0	0	0	0	0	0	0
heavy chain	V region	Ighv1-61	0	0	0	0	0	0	0	0	0	0	0	0	0	0	0
heavy chain	V region	Ighv1-62	0	0	0	0	0	1	0	0	0	0	0	0	0	0	0
heavy chain	V region	Ighv1-62-1	0	0	0	0	0	0	0	0	0	0	0	0	0	0	0
heavy chain	V region	Ighv1-62-2	0	0	0	0	0	0	0	0	0	0	0	0	0	0	0
heavy chain	V region	Ighv1-62-3	0	0	0	0	0	0	0	0	0	0	0	0	0	0	0
heavy chain	V region	Ighv1-63	0	0	0	0	0	0	0	0	0	0	0	0	0	0	0
heavy chain	V region	Ighv1-64	0	0	0	0	0	0	0	0	0	0	0	0	0	0	0
heavy chain	V region	Ighv1-65	0	0	0	0	0	0	0	0	0	0	0	0	0	0	0
heavy chain	V region	Ighv1-66	0	0	0	0	0	0	0	0	0	0	0	0	0	0	0
heavy chain	V region	Ighv1-67	0	0	0	0	0	0	0	0	0	0	0	0	0	0	0
heavy chain	V region	Ighv1-68	0	0	0	0	0	0	0	0	0	0	0	0	0	0	0
heavy chain	V region	Ighv1-69	0	0	0	0	0	0	0	0	0	0	0	0	0	0	0
heavy chain	V region	Ighv1-7	0	0	0	0	0	0	0	0	0	0	0	0	0	0	0
heavy chain	V region	Ighv1-70	0	0	0	0	0	0	0	0	0	0	0	0	0	0	0
heavy chain	V region	Ighv1-71	0	0	0	0	0	0	0	0	0	0	0	0	0	0	0
heavy chain	V region	Ighv1-72	0	0	0	0	0	0	0	0	0	0	0	0	0	0	0
heavy chain	V region	Ighv1-73	0	0	0	0	0	0	0	0	0	0	0	0	0	0	0
heavy chain	V region	Ighv1-74	0	0	0	0	0	0	0	0	0	0	0	0	0	0	0
heavy chain	V region	Ighv1-75	0	0	0	0	0	0	0	0	0	0	0	0	0	0	0
heavy chain	V region	Ighv1-76	0	0	0	0	0	0	0	0	0	0	0	0	0	0	0
heavy chain	V region	Ighv1-77	0	0	0	0	0	0	0	0	0	0	0	0	0	0	0
heavy chain	V region	Ighv1-78	0	0	0	0	0	0	0	0	0	0	0	0	0	0	0
heavy chain	V region	Ighv1-79	0	0	0	0	0	0	0	0	0	0	0	0	0	0	0
heavy chain	V region	Ighv1-8	0	0	0	0	0	0	0	0	0	0	0	0	0	0	0
heavy chain	V region	Ighv1-80	0	0	0	0	0	1	0	0	0	0	0	0	0	0	0
heavy chain	V region	Ighv1-81	0	0	0	0	0	0	0	0	0	0	0	0	0	0	0
heavy chain	V region	Ighv1-82	0	0	0	0	0	0	0	0	0	0	0	0	0	0	0
heavy chain	V region	Ighv1-83	0	0	0	0	0	0	0	0	0	0	0	0	0	0	0
heavy chain	V region	Ighv1-84	0	0	0	0	0	0	0	0	0	0	0	0	0	0	0
heavy chain	V region	Ighv1-85	0	0	0	0	0	0	0	0	0	0	0	0	0	0	0
heavy chain	V region	Ighv1-86	0	0	0	0	0	0	0	0	0	0	0	0	0	0	0
heavy chain	V region	Ighv1-9	0	0	0	0	0	0	0	0	0	0	0	0	0	0	0
heavy chain	V region	Ighv10-1	0	0	0	0	0	0	0	0	0	0	0	0	0	0	0
heavy chain	V region	Ighv10-2	0	0	0	0	0	0	0	0	0	0	0	0	0	0	0
heavy chain	V region	Ighv10-3	0	0	0	0	0	0	0	0	0	0	0	0	0	0	0
heavy chain	V region	Ighv10-4	0	0	0	0	0	0	0	0	0	0	0	0	0	0	0
heavy chain	V region	Ighv11-1	0	0	0	0	0	0	0	0	0	0	0	0	0	0	0
heavy chain	V region	Ighv11-2	0	0	0	0	0	0	0	0	0	0	0	0	0	0	0
heavy chain	V region	Ighv12-1	0	0	0	0	0	0	0	0	0	0	0	0	0	0	0
heavy chain	V region	Ighv12-2	0	0	0	0	0	0	0	0	0	0	0	0	0	0	0
heavy chain	V region	Ighv12-3	0	0	0	0	0	0	0	0	0	0	0	0	0	0	0
heavy chain	V region	Ighv13-1	0	0	0	0	0	0	0	0	0	0	0	0	0	0	0
heavy chain	V region	Ighv13-2	0	0	0	0	0	0	0	0	0	0	0	0	0	0	0
heavy chain	V region	Ighv14-1	0	0	0	0	0	0	0	0	0	0	0	0	0	0	0
heavy chain	V region	Ighv14-2	0	0	0	0	0	0	0	0	0	0	0	0	0	0	0
heavy chain	V region	Ighv14-3	0	0	0	0	0	0	0	0	0	0	0	0	0	0	0
heavy chain	V region	Ighv14-4	0	0	0	0	0	0	0	0	0	0	0	0	0	0	0
heavy chain	V region	Ighv15-1	0	0	0	0	0	0	0	0	0	0	0	0	0	0	0
heavy chain	V region	Ighv15-2	0	0	0	0	0	0	0	0	0	0	0	0	0	0	0
heavy chain	V region	Ighv16-1	0	0	0	0	0	0	0	0	0	0	0	0	0	0	0
heavy chain	V region	Ighv2-1	0	0	0	0	0	0	0	0	0	0	0	0	0	0	0
heavy chain	V region	Ighv2-2	0	0	0	0	0	0	0	0	0	0	0	0	0	0	0
heavy chain	V region	Ighv2-3	0	0	0	0	0	0	0	0	0	0	0	0	0	0	0
heavy chain	V region	Ighv2-4	0	0	0	0	0	0	0	0	0	0	0	0	0	0	0
heavy chain	V region	Ighv2-5	0	0	0	0	0	0	0	0	0	0	0	0	0	0	0
heavy chain	V region	Ighv2-6	0	0	0	0	0	0	0	0	0	0	0	0	0	0	0
heavy chain	V region	Ighv2-6-8	0	0	0	0	0	0	0	0	0	0	0	0	0	0	0
heavy chain	V region	Ighv2-7	0	0	0	0	0	0	0	0	0	0	0	0	0	0	0
heavy chain	V region	Ighv2-8	0	0	0	0	0	0	0	0	0	0	0	0	0	0	0
heavy chain	V region	Ighv2-9	0	0	0	0	0	0	0	0	0	0	0	0	0	0	0
heavy chain	V region	Ighv2-9-1	0	0	0	0	0	0	0	0	0	0	0	0	0	0	0
heavy chain	V region	Ighv3-1	0	0	0	0	0	0	0	0	0	0	0	0	0	0	0
heavy chain	V region	Ighv3-2	0	0	0	0	0	0	0	0	0	0	0	0	0	0	0
heavy chain	V region	Ighv3-3	0	0	0	0	0	0	0	0	0	0	0	0	0	0	0
heavy chain	V region	Ighv3-4	0	0	0	0	0	0	0	0	0	0	0	0	0	0	0
heavy chain	V region	Ighv3-5	0	0	0	0	0	0	0	0	0	0	0	0	0	0	0
heavy chain	V region	Ighv3-6	0	0	0	0	0	0	0	0	0	0	0	0	0	0	0
heavy chain	V region	Ighv3-7	0	0	0	0	0	0	0	0	0	0	0	0	0	0	0
heavy chain	V region	Ighv3-8	0	0	0	0	0	0	0	0	0	0	0	0	0	0	0
heavy chain	V region	Ighv4-1	0	0	0	0	0	0	0	0	0	0	0	0	0	0	0
heavy chain	V region	Ighv4-2	0	0	0	0	0	0	0	0	0	0	0	0	0	0	0
heavy chain	V region	Ighv5-1	0	0	0	0	0	0	0	0	0	0	0	0	0	0	0
heavy chain	V region	Ighv5-10	0	0	0	0	0	0	0	0	0	0	0	0	0	0	0
heavy chain	V region	Ighv5-11	0	0	0	0	0	0	1	0	0	0	0	0	0	0	0
heavy chain	V region	Ighv5-12	0	0	0	0	0	0	0	0	0	0	0	0	0	0	0
heavy chain	V region	Ighv5-12-4	0	0	0	0	0	0	0	0	0	0	0	0	0	0	0
heavy chain	V region	Ighv5-13	0	0	0	0	0	0	0	0	0	0	0	0	0	0	0
heavy chain	V region	Ighv5-15	0	0	0	0	0	0	0	0	0	0	0	0	0	0	0
heavy chain	V region	Ighv5-16	0	0	0	0	0	0	0	0	0	0	0	0	0	0	0
heavy chain	V region	Ighv5-17	0	0	0	0	0	0	0	0	0	0	0	0	0	0	0
heavy chain	V region	Ighv5-18	0	0	0	0	0	0	0	0	0	0	0	0	0	0	0
heavy chain	V region	Ighv5-19	0	0	0	0	0	0	0	0	0	0	0	0	0	0	0
heavy chain	V region	Ighv5-2	0	0	0	0	0	0	0	0	0	0	0	0	0	0	0
heavy chain	V region	Ighv5-21	0	0	0	0	0	0	0	0	0	0	0	0	0	0	0
heavy chain	V region	Ighv5-3	0	0	0	0	0	0	0	0	0	0	0	0	0	0	0
heavy chain	V region	Ighv5-4	0	0	0	0	0	0	0	0	0	0	0	0	0	0	0
heavy chain	V region	Ighv5-5	0	0	0	0	0	0	0	0	0	0	0	0	0	0	0
heavy chain	V region	Ighv5-6	0	0	0	0	0	0	0	0	0	0	0	0	0	0	0
heavy chain	V region	Ighv5-7	0	0	0	0	0	0	0	0	0	0	0	0	0	0	0
heavy chain	V region	Ighv5-8	0	0	0	0	0	0	0	0	0	0	0	0	0	0	0
heavy chain	V region	Ighv5-8-1	0	0	0	0	0	0	0	0	0	0	0	0	0	0	0
heavy chain	V region	Ighv5-9	0	0	0	0	0	0	0	0	0	0	0	0	0	0	0
heavy chain	V region	Ighv5-9-1	0	0	0	0	0	0	0	0	0	0	0	0	0	0	0
heavy chain	V region	Ighv6-1	0	0	0	0	0	0	0	0	0	0	0	0	0	0	0
heavy chain	V region	Ighv6-2	0	0	0	0	0	0	0	0	0	0	0	0	0	0	0
heavy chain	V region	Ighv6-3	0	0	0	0	0	0	0	0	0	0	0	0	0	0	0
heavy chain	V region	Ighv6-4	0	0	0	0	0	0	0	0	0	0	0	0	0	0	0
heavy chain	V region	Ighv6-5	0	0	0	0	0	0	0	0	0	0	0	0	0	0	0
heavy chain	V region	Ighv6-6	0	0	0	0	0	0	0	0	0	0	0	0	0	0	0
heavy chain	V region	Ighv6-7	0	0	0	0	0	0	0	0	0	0	0	0	0	0	0
heavy chain	V region	Ighv7-1	0	0	0	0	0	0	0	0	0	0	0	0	0	0	0
heavy chain	V region	Ighv7-2	0	0	0	0	0	0	0	0	0	0	0	0	0	0	0
heavy chain	V region	Ighv7-3	0	0	0	0	0	0	0	0	0	0	0	0	0	0	0
heavy chain	V region	Ighv7-4	0	0	0	0	0	0	0	0	0	0	0	0	0	0	0
heavy chain	V region	Ighv8-1	0	0	0	0	0	0	0	0	0	0	0	0	0	0	0
heavy chain	V region	Ighv8-10	0	0	0	0	0	0	0	0	0	0	0	0	0	0	0
heavy chain	V region	Ighv8-11	0	0	0	0	0	0	0	0	0	0	0	0	0	0	0
heavy chain	V region	Ighv8-12	0	0	0	0	0	0	0	0	0	0	0	0	0	0	0
heavy chain	V region	Ighv8-13	0	0	0	0	0	0	0	0	0	0	0	0	0	0	0
heavy chain	V region	Ighv8-14	0	0	0	0	0	0	0	0	0	0	0	0	0	0	0
heavy chain	V region	Ighv8-15	0	0	0	0	0	0	0	0	0	0	0	0	0	0	0
heavy chain	V region	Ighv8-16	0	0	0	0	0	0	0	0	0	0	0	0	0	0	0
heavy chain	V region	Ighv8-2	0	0	0	0	0	0	0	0	0	0	0	0	0	0	0
heavy chain	V region	Ighv8-3	0	0	0	0	0	0	0	0	0	0	0	0	0	0	0
heavy chain	V region	Ighv8-4	0	0	0	0	0	0	0	0	0	0	0	0	0	0	0
heavy chain	V region	Ighv8-5	0	0	0	0	0	0	0	0	0	0	0	0	0	0	0
heavy chain	V region	Ighv8-6	0	0	0	0	0	0	0	0	0	0	0	0	0	0	0
heavy chain	V region	Ighv8-7	0	0	0	0	0	0	0	0	0	0	0	0	0	0	0
heavy chain	V region	Ighv8-8	0	0	0	0	0	0	0	0	0	0	0	0	0	0	0
heavy chain	V region	Ighv8-9	0	0	0	0	0	0	0	0	0	0	0	0	0	0	0
heavy chain	V region	Ighv9-1	0	0	0	0	0	0	0	0	0	0	0	0	0	0	0
heavy chain	V region	Ighv9-2	0	0	0	0	0	0	0	0	0	0	0	0	0	0	0
heavy chain	V region	Ighv9-3	0	0	0	0	0	0	0	0	0	0	0	0	0	0	0
heavy chain	V region	Ighv9-4	0	0	0	0	0	0	0	0	0	0	0	0	0	0	0
heavy chain	D region	Ighd1-1	0	0	0	0	0	0	0	0	0	0	0	0	0	0	0
heavy chain	D region	Ighd2-3	0	0	0	0	0	0	0	0	0	0	0	0	0	0	0
heavy chain	D region	Ighd2-4	0	0	0	0	0	0	0	0	0	0	0	0	0	0	0
heavy chain	D region	Ighd2-5	0	0	0	0	0	0	0	0	0	0	0	0	0	0	0
heavy chain	D region	Ighd2-6	0	0	0	0	0	0	0	0	0	0	0	0	0	0	0
heavy chain	D region	Ighd2-7	0	0	0	0	0	0	0	0	0	0	0	0	0	0	0
heavy chain	D region	Ighd2-8	0	0	0	0	0	0	0	0	0	0	0	0	0	0	0
heavy chain	D region	Ighd3-1	0	0	0	0	0	0	0	0	0	0	0	0	0	0	0
heavy chain	D region	Ighd3-2	0	0	0	0	0	0	0	0	0	0	0	0	0	0	0
heavy chain	D region	Ighd4-1	0	0	0	0	0	0	0	0	0	0	0	0	0	0	0
heavy chain	D region	Ighd5-2	0	0	0	0	0	0	0	0	0	0	0	0	0	0	0
heavy chain	D region	Ighd5-3	0	0	0	0	0	0	0	0	0	0	0	0	0	0	0
heavy chain	D region	Ighd5-4	0	0	0	0	0	0	0	0	0	0	0	0	0	0	0
heavy chain	D region	Ighd5-5	0	0	0	0	0	0	0	0	0	0	0	0	0	0	0
heavy chain	D region	Ighd5-6	0	0	0	0	0	0	0	0	0	0	0	0	0	0	0
heavy chain	D region	Ighd5-7	0	0	0	0	0	0	0	0	0	0	0	0	0	0	0
heavy chain	D region	Ighd5-8	0	0	0	0	0	0	0	0	0	0	0	0	0	0	0
heavy chain	J region	Ighj1	0	0	0	0	0	4	0	0	0	0	0	0	0	0	0
heavy chain	J region	Ighj2	0	0	0	0	0	0	0	0	0	0	0	0	0	0	0
heavy chain	J region	Ighj3	0	0	0	0	0	0	0	0	0	0	0	0	0	0	0
heavy chain	J region	Ighj4	0	0	0	0	0	0	0	0	0	0	0	0	0	0	0
light chain	constant region	Igkc	0	0	0	0	1	0	0	0	0	0	0	0	0	0	0
light chain	constant region	Iglc1	0	0	0	0	0	0	0	0	0	0	0	0	0	0	0
light chain	constant region	Iglc2	0	0	0	0	0	0	0	0	0	0	0	0	0	0	0
light chain	constant region	Iglc3	0	0	0	0	0	0	0	0	0	0	0	0	0	0	0
light chain	constant region	Iglc4	0	0	0	0	0	0	0	0	0	0	0	0	0	0	0
light chain	V region	Igkv1-108	0	0	0	0	0	0	0	0	0	0	0	0	0	0	0
light chain	V region	Igkv1-110	0	0	0	0	0	0	0	0	0	0	0	0	0	0	0
light chain	V region	Igkv1-115	0	0	0	0	0	0	0	0	0	0	0	0	0	0	0
light chain	V region	Igkv1-117	0	0	0	0	0	0	0	0	0	0	0	0	0	0	0
light chain	V region	Igkv1-122	0	0	0	0	0	0	0	0	0	0	0	0	0	0	0
light chain	V region	Igkv1-131	0	0	0	0	0	0	0	0	0	0	0	0	0	0	0
light chain	V region	Igkv1-132	0	0	0	0	0	0	0	0	0	0	0	0	0	0	0
light chain	V region	Igkv1-133	0	0	0	0	0	0	0	0	0	0	0	0	0	0	0
light chain	V region	Igkv1-135	0	0	0	0	0	0	0	0	0	0	0	0	0	0	0
light chain	V region	Igkv1-136	0	0	0	0	0	0	0	0	0	0	0	0	0	0	0
light chain	V region	Igkv1-35	0	0	0	0	0	0	0	0	0	0	0	0	0	0	0
light chain	V region	Igkv1-88	0	0	0	0	0	0	0	0	0	0	0	0	0	0	0
light chain	V region	Igkv1-99	0	0	0	0	0	0	0	0	0	0	0	0	0	0	0
light chain	V region	Igkv10-94	0	0	0	0	0	0	0	0	0	0	0	0	0	0	0
light chain	V region	Igkv10-95	0	0	0	0	0	0	0	0	0	0	0	0	0	0	0
light chain	V region	Igkv10-96	0	0	0	0	0	0	0	0	0	0	0	0	0	0	0
light chain	V region	Igkv11-106	0	0	0	0	0	0	0	0	0	0	0	0	0	0	0
light chain	V region	Igkv11-114	0	0	0	0	0	0	0	0	0	0	0	0	0	0	0
light chain	V region	Igkv11-118	0	0	0	0	0	0	0	0	0	0	0	0	0	0	0
light chain	V region	Igkv11-125	0	0	0	0	0	0	0	0	0	0	0	0	0	0	0
light chain	V region	Igkv12-38	0	0	0	0	0	0	0	0	0	0	0	0	0	0	0
light chain	V region	Igkv12-40	0	0	0	0	0	0	0	0	0	0	0	0	0	0	0
light chain	V region	Igkv12-41	0	0	0	0	0	0	0	0	0	0	0	0	0	0	0
light chain	V region	Igkv12-42	0	0	0	0	0	0	0	0	0	0	0	0	0	0	0
light chain	V region	Igkv12-44	0	0	0	0	0	0	0	0	0	0	0	0	0	0	0
light chain	V region	Igkv12-46	0	0	0	0	0	0	0	0	0	0	0	0	0	0	0
light chain	V region	Igkv12-47	0	0	0	0	0	0	0	0	0	0	0	0	0	0	0
light chain	V region	Igkv12-49	0	0	0	0	0	0	0	0	0	0	0	0	0	0	0
light chain	V region	Igkv12-66	0	0	0	0	0	0	0	0	0	0	0	0	0	0	0
light chain	V region	Igkv12-67	0	0	0	0	0	0	0	0	0	0	0	0	0	0	0
light chain	V region	Igkv12-89	0	0	0	0	0	0	0	0	0	0	0	0	0	0	0
light chain	V region	Igkv12-98	0	0	0	0	0	0	0	0	0	0	0	0	0	0	0
light chain	V region	Igkv13-54-1	0	0	0	0	0	0	0	0	0	0	0	0	0	0	0
light chain	V region	Igkv13-55-1	0	0	0	0	0	0	0	0	0	0	0	0	0	0	0
light chain	V region	Igkv13-56-1	0	0	0	0	0	0	0	0	0	0	0	0	0	0	0
light chain	V region	Igkv13-57-1	0	0	0	0	0	0	0	0	0	0	0	0	0	0	0
light chain	V region	Igkv13-57-2	0	0	0	0	0	0	0	0	0	0	0	0	0	0	0
light chain	V region	Igkv13-61-1	0	0	0	0	0	0	0	0	0	0	0	0	0	0	0
light chain	V region	Igkv13-62-1	0	0	0	0	0	0	0	0	0	0	0	0	0	0	0
light chain	V region	Igkv13-64	0	0	0	0	0	0	0	0	0	0	0	0	0	0	0
light chain	V region	Igkv13-71-1	0	0	0	0	0	0	0	0	0	0	0	0	0	0	0
light chain	V region	Igkv13-73-1	0	0	0	0	0	0	0	0	0	0	0	0	0	0	0
light chain	V region	Igkv13-74-1	0	0	0	0	0	0	0	0	0	0	0	0	0	0	0
light chain	V region	Igkv13-76	0	0	0	0	0	0	0	0	0	0	0	0	0	0	0
light chain	V region	Igkv13-78-1	0	0	0	0	0	0	0	0	0	0	0	0	0	0	0
light chain	V region	Igkv13-80-1	0	0	0	0	0	0	0	0	0	0	0	0	0	0	0
light chain	V region	Igkv13-82	0	0	0	0	0	0	0	0	0	0	0	0	0	0	0
light chain	V region	Igkv13-84	0	0	0	0	0	0	0	0	0	0	0	0	0	0	0
light chain	V region	Igkv13-85	0	0	0	0	0	0	0	0	0	0	0	0	0	0	0
light chain	V region	Igkv13-87	0	0	0	0	0	0	0	0	0	0	0	0	0	0	0
light chain	V region	Igkv14-100	0	0	0	0	0	0	0	0	0	0	0	0	0	0	0
light chain	V region	Igkv14-111	0	0	0	0	0	0	0	0	0	0	0	0	0	0	0
light chain	V region	Igkv14-118-1	0	0	0	0	0	0	0	0	0	0	0	0	0	0	0
light chain	V region	Igkv14-118-2	0	0	0	0	0	0	0	0	0	0	0	0	0	0	0
light chain	V region	Igkv14-126	0	0	0	0	0	0	0	0	0	0	0	0	0	0	0
light chain	V region	Igkv14-126-1	0	0	0	0	0	0	0	0	0	0	0	0	0	0	0
light chain	V region	Igkv14-130	0	0	0	0	0	0	0	0	0	0	0	0	0	0	0
light chain	V region	Igkv14-134-1	0	0	0	0	0	0	0	0	0	0	0	0	0	0	0
light chain	V region	Igkv15-101	0	0	0	0	0	0	0	0	0	0	0	0	0	0	0
light chain	V region	Igkv15-101-1	0	0	0	0	0	0	0	0	0	0	0	0	0	0	0
light chain	V region	Igkv15-102	0	0	0	0	0	0	0	0	0	0	0	0	0	0	0
light chain	V region	Igkv15-103	0	0	0	0	0	0	0	0	0	0	0	0	0	0	0
light chain	V region	Igkv15-97	0	0	0	0	0	0	0	0	0	0	0	0	0	0	0
light chain	V region	Igkv16-104	0	0	0	0	0	0	0	0	0	0	0	0	0	0	0
light chain	V region	Igkv17-121	0	0	0	0	0	0	0	0	0	0	0	0	0	0	0
light chain	V region	Igkv17-127	0	0	0	0	0	0	0	0	0	0	0	0	0	0	0
light chain	V region	Igkv17-134	0	0	0	0	0	0	0	0	0	0	0	0	0	0	0
light chain	V region	Igkv18-36	0	0	0	0	0	0	0	0	0	0	0	0	0	0	0
light chain	V region	Igkv19-93	0	0	0	0	0	0	0	0	0	0	0	0	0	0	0
light chain	V region	Igkv2-105	0	0	0	0	0	0	0	0	0	0	0	0	0	0	0
light chain	V region	Igkv2-107	0	0	0	0	0	0	0	0	0	0	0	0	0	0	0
light chain	V region	Igkv2-109	0	0	0	0	0	0	0	0	0	0	0	0	0	0	0
light chain	V region	Igkv2-112	0	0	0	0	0	0	0	0	0	0	0	0	0	0	0
light chain	V region	Igkv2-113	0	0	0	0	0	0	0	0	0	0	0	0	0	0	0
light chain	V region	Igkv2-116	0	0	0	0	0	0	0	0	0	0	0	0	0	0	0
light chain	V region	Igkv2-137	0	0	0	0	0	0	0	0	0	0	0	0	0	0	0
light chain	V region	Igkv2-93-1	0	0	0	0	0	0	0	0	0	0	0	0	0	0	0
light chain	V region	Igkv2-95-1	0	0	0	0	0	0	0	0	0	0	0	0	0	0	0
light chain	V region	Igkv2-95-2	0	0	0	0	0	0	0	0	0	0	0	0	0	0	0
light chain	V region	Igkv20-101-2	0	0	0	0	0	0	0	0	0	0	0	0	0	0	0
light chain	V region	Igkv3-1	0	0	0	0	0	0	0	0	0	0	0	0	0	0	0
light chain	V region	Igkv3-10	0	0	0	0	0	0	0	0	0	0	0	0	0	0	0
light chain	V region	Igkv3-11	0	0	0	0	0	0	0	0	0	0	0	0	0	0	0
light chain	V region	Igkv3-12	0	0	0	0	0	0	0	0	0	0	0	0	0	0	0
light chain	V region	Igkv3-12-1	0	0	0	0	0	0	0	0	0	0	0	0	0	0	0
light chain	V region	Igkv3-2	0	1	0	0	0	0	0	0	0	0	0	0	0	0	0
light chain	V region	Igkv3-3	0	0	0	0	0	0	0	0	0	0	0	0	0	0	0
light chain	V region	Igkv3-4	0	0	0	0	0	0	0	0	0	0	0	0	0	0	0
light chain	V region	Igkv3-5	0	0	0	0	0	0	0	0	0	0	0	0	0	0	0
light chain	V region	Igkv3-6	0	0	0	0	0	0	0	0	0	0	0	0	0	0	0
light chain	V region	Igkv3-7	0	0	0	0	0	0	0	1	0	0	0	0	0	0	0
light chain	V region	Igkv3-8	0	0	0	0	0	0	0	0	0	0	0	0	0	0	0
light chain	V region	Igkv3-9	0	0	0	0	0	0	0	0	0	0	0	0	0	0	0
light chain	V region	Igkv4-50	0	0	0	0	0	0	0	0	0	0	0	0	0	0	0
light chain	V region	Igkv4-51	0	0	0	0	0	0	0	0	0	0	0	0	0	0	0
light chain	V region	Igkv4-53	0	0	0	0	0	0	0	0	0	0	0	0	0	0	0
light chain	V region	Igkv4-54	0	0	0	0	0	0	0	0	0	0	0	0	0	0	0
light chain	V region	Igkv4-55	0	0	0	0	0	0	0	0	0	0	0	0	0	0	0
light chain	V region	Igkv4-56	0	0	0	0	0	0	0	0	0	0	0	0	0	0	0
light chain	V region	Igkv4-57	0	0	0	0	0	0	0	0	0	0	0	0	0	0	0
light chain	V region	Igkv4-57-1	0	0	0	0	0	0	0	0	0	0	0	0	0	0	0
light chain	V region	Igkv4-58	0	0	0	0	0	0	0	0	0	0	0	0	0	0	0
light chain	V region	Igkv4-59	0	0	0	0	0	0	0	0	0	0	0	0	0	0	0
light chain	V region	Igkv4-60	0	0	0	0	0	0	0	0	0	0	0	0	0	0	0
light chain	V region	Igkv4-61	0	0	0	0	0	0	0	0	0	0	0	0	0	0	0
light chain	V region	Igkv4-62	0	0	0	0	0	0	0	0	0	0	0	0	0	0	0
light chain	V region	Igkv4-63	0	0	0	0	0	0	0	0	0	0	0	0	0	0	0
light chain	V region	Igkv4-65	0	0	0	0	0	0	0	0	0	0	0	0	0	0	0
light chain	V region	Igkv4-68	0	0	0	0	0	0	0	0	0	0	0	0	0	0	0
light chain	V region	Igkv4-69	0	0	0	0	0	0	0	1	0	0	0	0	0	0	0
light chain	V region	Igkv4-70	0	0	0	0	1	0	0	0	0	0	0	0	0	0	0
light chain	V region	Igkv4-71	0	0	0	0	0	0	0	0	0	0	0	0	0	0	0
light chain	V region	Igkv4-72	0	0	0	0	0	0	0	0	0	0	0	0	0	0	0
light chain	V region	Igkv4-73	0	0	0	0	0	0	0	0	0	0	0	0	0	0	0
light chain	V region	Igkv4-74	0	0	0	0	0	0	0	0	0	0	0	0	0	0	0
light chain	V region	Igkv4-75	0	0	0	0	0	0	0	0	0	0	0	0	0	0	0
light chain	V region	Igkv4-77	0	0	0	0	0	0	0	0	0	0	0	0	0	0	0
light chain	V region	Igkv4-78	0	0	0	0	0	0	0	0	0	0	0	0	0	0	0
light chain	V region	Igkv4-79	0	0	0	0	0	0	0	0	0	0	0	0	0	0	0
light chain	V region	Igkv4-80	0	0	0	0	0	0	0	0	0	0	0	0	0	0	0
light chain	V region	Igkv4-81	0	0	0	0	0	0	0	0	0	0	0	0	0	0	0
light chain	V region	Igkv4-83	0	0	0	0	0	0	0	0	0	0	0	0	0	0	0
light chain	V region	Igkv4-86	0	0	0	0	0	0	0	0	0	0	0	0	0	0	0
light chain	V region	Igkv4-90	0	0	0	0	0	0	0	0	0	0	0	0	0	0	0
light chain	V region	Igkv4-91	0	0	0	0	0	0	0	0	0	0	0	0	0	0	0
light chain	V region	Igkv4-92	0	0	0	0	0	0	0	0	0	0	0	0	0	0	0
light chain	V region	Igkv5-37	0	0	0	0	0	0	0	0	0	0	0	0	0	0	0
light chain	V region	Igkv5-39	0	0	0	0	0	0	0	0	0	0	0	0	0	0	0
light chain	V region	Igkv5-40-1	0	0	0	0	0	0	0	0	0	0	0	0	0	0	0
light chain	V region	Igkv5-43	0	0	0	0	0	0	0	0	0	0	0	0	0	0	0
light chain	V region	Igkv5-45	0	0	0	0	0	0	0	0	0	0	0	0	0	0	0
light chain	V region	Igkv5-48	0	0	0	0	0	0	0	0	0	0	0	0	0	0	0
light chain	V region	Igkv6-13	0	0	0	0	0	0	0	0	0	0	0	0	0	0	0
light chain	V region	Igkv6-14	0	1	0	0	0	0	0	0	0	0	0	0	0	0	0
light chain	V region	Igkv6-15	0	0	0	0	0	0	0	0	0	0	0	0	0	0	0
light chain	V region	Igkv6-17	0	0	0	0	0	0	0	2	0	0	0	0	0	0	0
light chain	V region	Igkv6-20	0	0	0	0	0	0	0	0	0	0	0	0	0	0	0
light chain	V region	Igkv6-23	0	0	0	0	0	0	0	0	0	0	0	0	0	0	0
light chain	V region	Igkv6-25	0	0	0	0	0	0	0	0	0	0	0	0	0	0	0
light chain	V region	Igkv6-29	0	0	0	0	0	0	0	0	0	0	0	0	0	0	0
light chain	V region	Igkv6-32	0	0	0	0	0	0	0	0	0	0	0	0	0	0	0
light chain	V region	Igkv7-33	0	0	0	0	0	0	0	1	0	0	0	0	0	0	0
light chain	V region	Igkv8-16	0	0	0	0	0	0	0	0	0	0	0	0	0	0	0
light chain	V region	Igkv8-18	0	0	0	0	0	0	0	0	0	0	0	0	0	0	0
light chain	V region	Igkv8-19	0	0	0	0	0	0	0	0	0	0	0	0	0	0	0
light chain	V region	Igkv8-21	0	0	0	0	0	0	0	0	0	0	0	0	0	0	0
light chain	V region	Igkv8-22	0	0	0	0	0	0	0	0	0	0	0	0	0	0	0
light chain	V region	Igkv8-24	0	0	0	0	0	0	0	0	0	0	0	0	0	0	0
light chain	V region	Igkv8-26	0	0	0	0	0	0	0	0	0	0	0	0	0	0	0
light chain	V region	Igkv8-27	0	0	0	0	0	0	0	0	0	0	0	0	0	0	0
light chain	V region	Igkv8-28	0	0	0	0	0	0	0	0	0	0	0	0	0	0	0
light chain	V region	Igkv8-30	0	0	0	0	0	0	0	0	0	0	0	0	0	0	0
light chain	V region	Igkv8-31	0	0	0	0	0	0	0	0	0	0	0	0	0	0	0
light chain	V region	Igkv8-34	0	0	0	0	0	0	0	0	0	0	0	0	0	0	0
light chain	V region	Igkv9-119	0	0	0	0	0	0	0	0	0	0	0	0	0	0	0
light chain	V region	Igkv9-120	0	0	0	0	0	0	0	0	0	0	0	0	0	0	0
light chain	V region	Igkv9-123	0	0	0	0	0	0	0	0	0	0	0	0	0	0	0
light chain	V region	Igkv9-124	0	0	0	0	0	0	0	0	0	0	0	0	0	0	0
light chain	V region	Igkv9-128	0	0	0	0	0	0	0	0	0	0	0	0	0	0	0
light chain	V region	Igkv9-129	0	0	0	0	0	0	0	0	0	0	0	0	0	0	0
light chain	V region	Iglv1	0	0	0	0	0	0	0	0	0	0	0	0	0	0	0
light chain	V region	Iglv2	0	0	0	0	0	0	0	0	0	0	0	0	0	0	0
light chain	V region	Iglv3	0	0	0	0	0	0	0	0	0	0	0	0	0	0	0
light chain	J region	Igkj1	0	0	0	0	0	0	0	0	0	0	0	0	0	0	0
light chain	J region	Igkj2	0	0	0	0	0	0	0	0	0	0	0	0	0	0	0
light chain	J region	Igkj3	0	0	0	0	0	0	0	0	0	0	0	0	0	0	0
light chain	J region	Igkj4	0	0	0	0	0	0	0	0	0	0	0	0	0	0	0
light chain	J region	Igkj5	0	0	0	0	0	0	0	0	0	0	0	0	0	0	0
light chain	J region	Iglj1	0	0	0	0	0	0	0	0	0	0	0	0	0	0	0
light chain	J region	Iglj2	0	0	0	0	0	0	0	0	0	0	0	0	0	0	0
light chain	J region	Iglj3	0	0	0	0	0	0	0	0	0	0	0	0	0	0	0
light chain	J region	Iglj3p	0	0	0	0	0	0	0	0	0	0	0	0	0	0	0
light chain	J region	Iglj4	0	0	0	0	0	0	0	0	0	0	0	0	0	0	0
IgM receptor		Pigr	0	1	0	1	0	1	2	4	0	0	0	0	0	0	1
IgM receptor		Fcmr	0	3	0	0	1	0	1	125	0	0	0	1	0	0	1
IgM receptor		Fcamr	0	0	0	0	0	0	0	4	0	0	0	0	0	0	0
component of membrane-bound Ig		Cd79a	0	0	1	78	23	3	15	43	1	4	1	5	2	0	61
component of membrane-bound Ig		Cd79b	0	0	0	15	1	668	0	5	0	0	0	2	0	0	121
