# Supplementary material for: Comprehensive analysis of immunoglobulin expression in the mouse brain from embryonic to adult stages
Source: J Neuroinflammation. 2025 Jun 9;22:153. doi: 10.1186/s12974-025-03457-9 (PMC12147291; doi:10.1186/s12974-025-03457-9)
Supplement: Supplementary file 4 — Supplementary Material 4 [file 12974_2025_3457_MOESM4_ESM.xlsx]

## Sheet: Sup Table4
subclass_label	gene_Ighg1	Ighg1	gene_Ighg2b	Ighg2b	gene_Ighg2c	Ighg2c	gene_Ighg3	Ighg3	gene_Ighm	Ighm	gene_Igha	Igha	gene_Ighe	Ighe	gene_Ighd	Ighd	gene_Cd79a	Cd79a	gene_Cd79b	Cd79b	gene_Fcamr	Fcamr	gene_Fcmr	Fcmr	gene_Pigr	Pigr	gene_Ighj1	gene_Ighj2	gene_Ighj3	gene_Ighj4
Astro	0	0	0	0	0.000769428	0.00465174	0	0	0.005386	0.00958461	0	0	0	0	0.000256476	0.0153084	0.0010259	0.0259896	0	0	0	0	0	0	0.000256476	0.0268907	0	0	0	0
CA1-ProS	0	0	0	0	0.00012581	0.000760611	0	0	0.0178021	0.0316796	0	0	6.2905e-05	0.0602734	0.0012581	0.0750928	0.00710826	0.180076	0	0	0	0	0.00465497	0.179434	0.000314525	0.0329769	0	0	0	0
CA2-IG-FC	0	0	0	0	0	0	0	0	0.00914634	0.0162763	0	0	0	0	0	0	0.0152439	0.386179	0	0	0	0	0	0	0.00304878	0.319655	0	0	0	0
CA3	0	0	0	0	0	0	0	0	0.00716418	0.012749	0	0	0	0	0.000597015	0.0356343	0.00656716	0.166368	0	0	0.000597015	1	0.0041791	0.161091	0.00119403	0.12519	0	0	0	0
CR	0	0	0	0	0	0	0	0	0.00361011	0.00642434	0	0	0	0	0	0	0	0	0	0	0	0	0	0	0	0	0	0	0	0
CT SUB	0	0	0	0	0.00710695	0.0429666	0.00017334	0.0652778	0.0767897	0.136651	0	0	0	0	0.000520021	0.0310387	0.00398683	0.101	0	0	0	0	0.00398683	0.153679	0.000520021	0.0545225	0	0	0	0
Car3	4.45295e-05	0.256	0.00115777	1	0.139645	0.844252	0.000178118	0.0670771	0.0569088	0.101272	8.90591e-05	0.103103	0	0	0.00169212	0.100999	0.0054326	0.137626	0	0	0.000133589	0.223761	0.0034733	0.133885	0.000489825	0.0513566	0	0	0	0
DG	0	0	0	0	3.39282e-05	0.00020512	0	0	0.0281434	0.0500825	0	0	0	0	0.000474995	0.0283513	0.00617493	0.156432	0	0	1.69641e-05	0.0284149	0.000780349	0.0300799	0.000237497	0.0249009	0	0	0	0
Endo	0	0	0	0	0	0	0	0	0.009375	0.0166832	0	0	0	0	0	0	0	0	0	0	0	0	0	0	0	0	0	0	0	0
L2 IT ENTl	0	0	0	0	0.0015324	0.00926445	0	0	0.00350263	0.00623308	0	0	0	0	0.000656743	0.0391993	0.00853765	0.216287	0	0	0	0	0.00109457	0.0421922	0.000437828	0.0459049	0	0	0	0
L2 IT ENTm	0	0	0	0	0.00179775	0.0108687	0	0	0.00719101	0.0127967	0	0	0	0	0.00134831	0.0804775	0.00719101	0.182172	0	0	0	0	0.00359551	0.138595	0	0	0	0	0	0
L2/3 IT CTX	7.81488e-06	0.0449278	3.12595e-05	0.0269998	0.027821	0.168198	3.90744e-05	0.0147149	0.0224053	0.0398711	2.34446e-05	0.0271417	5.47042e-05	0.0524157	0.000586116	0.0349838	0.00733036	0.185702	1.56298e-05	0.000497547	5.47042e-05	0.0916295	0.00366518	0.141281	0.000679895	0.0712848	0	0	0	0
L2/3 IT ENTl	0	0	0	0	0.00450801	0.0272541	0	0	0.00668428	0.011895	0	0	0	0	0.000466345	0.027835	0.00979325	0.248096	0	0	0	0	0.0125913	0.485355	0	0	0	0	0	0
L2/3 IT PPP	0	0	0	0	0.00109734	0.00663421	0	0	0.00654101	0.01164	0	0	4.3033e-05	0.0412328	0.000516396	0.0308224	0.00363629	0.0921192	2.15165e-05	0.000684941	0	0	0.00309837	0.119432	0.000537912	0.0563984	0	0	0	0
L2/3 IT RHP	0	0	0	0	0.000645995	0.0039055	0	0	0.00549096	0.00977139	0	0	0	0	0.000968992	0.0578367	0.00807494	0.204565	0	0	0	0	0.0171189	0.659877	0.000322997	0.0338653	0	0	0	0
L3 IT ENT	0	0	0	0	0.000898069	0.00542947	0	0	0.0068852	0.0122525	0	0	0	0	0.00157162	0.0938061	0.00456518	0.115651	0	0	0	0	0.00254453	0.0980834	0.000673552	0.0706198	0	0	0	0
L4 RSP-ACA	0	0	0	0	0.00304812	0.018428	0	0	0.0202482	0.0360325	0	0	0	0	0.00130634	0.0779719	0.00653168	0.165469	0	0	0	0	0.000653168	0.0251775	0.000653168	0.0684826	0	0	0	0
L4/5 IT CTX	3.62371e-06	0.0208327	2.5366e-05	0.0219094	0.0357624	0.216209	6.16031e-05	0.023199	0.0167053	0.0297278	7.24743e-06	0.00839029	4.71083e-05	0.0451376	0.00050732	0.0302807	0.00508407	0.128796	7.24743e-06	0.00023071	4.34846e-05	0.0728366	0.00164879	0.0635555	0.0009168	0.0961235	0	0	0	0
L5 IT CTX	0	0	0.000876439	0.757008	0.165406	1	0.00177006	0.666584	0.150954	0.268629	0.000154666	0.179055	0.000326517	0.312857	0.00290428	0.173349	0.00747551	0.18938	0	0	5.15553e-05	0.086355	0.0143152	0.551804	0.00953772	1	0	0	0	0
L5 PPP	0	0	0	0	0.000845309	0.00511049	0	0	0.0211327	0.0376066	0	0	0	0	0.00253593	0.151363	0.010989	0.278388	0	0	0	0	0	0	0	0	0	0	0	0
L5 PT CTX	0	0	0	0	0.00469293	0.0283721	0.000115875	0.043637	0.0419467	0.074646	0	0	5.79374e-05	0.0555137	0.00162225	0.0968279	0.00845886	0.214291	0	0	5.79374e-05	0.0970452	0.00202781	0.0781655	0.000579374	0.0607456	0	0	0	0
L5/6 IT TPE-ENT	0.000173943	1	0.000347887	0.30048	0.0586189	0.354393	0	0	0.00747956	0.0133102	0.000173943	0.201373	0.00104366	1	0.00052183	0.0311467	0.00921899	0.233548	0.000173943	0.00553719	0	0	0.0160028	0.616856	0.00365281	0.382986	0	0	0	0
L5/6 NP CTX	0	0	0	0	0.00208182	0.0125861	6.30855e-05	0.0237572	0.0466833	0.0830749	0	0	0	0	0.000883197	0.0527158	0.00356433	0.0902964	3.15428e-05	0.00100411	6.30855e-05	0.105668	0.00249188	0.0960538	0.000693941	0.0727575	0	0	0	0
L6 CT CTX	1.34452e-05	0.0772964	0.000114284	0.0987108	0.0686982	0.41533	0.00265543	1	0.561942	1	4.03356e-05	0.0466962	0.000127729	0.122386	0.0106217	0.633983	0.00646042	0.163664	6.7226e-06	0.000214003	4.03356e-05	0.0675621	0.0259425	1	0.007973	0.835944	0	0	0	0
L6 IT CTX	1.27719e-05	0.0734255	0.000102175	0.0882517	0.0646513	0.390863	0.000587507	0.221248	0.211311	0.376037	6.38594e-05	0.0739295	0.000178806	0.171326	0.0039976	0.238607	0.00794411	0.201251	0	0	5.10875e-05	0.0855716	0.00314188	0.121109	0.0017242	0.180777	0	0	0	0
L6 IT ENTl	0	0	0	0	0.00247729	0.014977	0	0	0.00412882	0.00734741	0	0	0	0	0	0	0.00990917	0.251032	0	0	0	0	0.00990917	0.381966	0	0	0	0	0	0
L6b CTX	0	0	6.64452e-05	0.0573907	0.100266	0.606178	0.00152824	0.575516	0.238073	0.423661	0.000863787	1	0.000265781	0.254662	0.00478405	0.285548	0.0069103	0.175061	0	0	0	0	0.00631229	0.243319	0.00186047	0.195064	0	0	0	0
L6b/CT ENT	0	0	4.93364e-05	0.0426134	0.0142582	0.0862012	0.000493364	0.185795	0.142434	0.253468	0	0	4.93364e-05	0.0472725	0.00187478	0.111901	0.00606838	0.153732	0	0	0	0	0.00483497	0.186372	0.000592037	0.0620732	0	0	0	0
Lamp5	0	0	0	0	0.00263383	0.0159234	0	0	0.0250332	0.0445477	0	0	2.37282e-05	0.0227355	0.00052202	0.0311581	0.00294229	0.0745381	0	0	0	0	0.000427107	0.0164636	0.000877942	0.0920495	0	0	0	0
Meis2	0	0	0	0	0	0	0	0	0	0	0	0	0	0	0	0	0	0	0	0	0	0	0	0	0	0	0	0	0	0
Micro-PVM	0	0	0	0	0	0	0	0	0.348691	0.620511	0	0	0	0	0.0167539	1	0.00104712	0.0265271	0.0314136	1	0	0	0	0	0	0	0	0	0	0
NP PPP	0	0	0	0	0.00153139	0.00925837	0	0	0.00421133	0.00749425	0	0	0	0	0.000382848	0.0228513	0.00574273	0.145482	0	0	0	0	0.00727412	0.280394	0.00229709	0.240843	0	0	0	0
NP SUB	0	0	0	0	0.00106952	0.006466	0	0	0.00427807	0.00761302	0	0	0	0	0.000534759	0.0319184	0.00427807	0.108378	0	0	0	0	0.00427807	0.164906	0	0	0	0	0	0
Oligo	0	0	0	0	0.000778903	0.00470902	0	0	0.00734394	0.0130689	0	0	0	0	0	0	0.000667631	0.0169133	0	0	0	0	0.000222544	0.00857834	0.000667631	0.069999	0	0	0	0
Pvalb	0	0	0	0	0.00755064	0.045649	3.28289e-05	0.0123629	0.0203211	0.0361622	3.28289e-05	0.0380057	9.84866e-05	0.0943666	0.000328289	0.0195947	0.00400512	0.101463	0	0	3.28289e-05	0.0549883	0.000525262	0.0202471	0.000919208	0.0963761	0	0	0	0
SMC-Peri	0	0	0	0	0	0	0	0	0.00694444	0.0123579	0	0	0	0	0	0	0	0	0	0	0	0	0	0	0	0	0	0	0	0
SUB-ProS	0	0	0	0	0.000238834	0.00144393	0	0	0.00549319	0.00977537	0	0	0	0	0.00119417	0.0712772	0.0109864	0.278322	0	0	0	0	0.00955338	0.368252	0.000238834	0.025041	0	0	0	0
Sncg	0	0	0	0	0.0119622	0.0723203	0	0	0.0611083	0.108745	0	0	0	0	0.000504432	0.0301083	0.00208979	0.0529413	0	0	0	0	0.000360308	0.0138887	0.000720617	0.0755544	0	0	0	0
Sst	0	0	2.1994e-05	0.0189969	0.00600435	0.0363006	6.59819e-05	0.024848	0.0718983	0.127946	2.1994e-05	0.0254623	8.79759e-05	0.0842956	0.00105571	0.0630127	0.0029252	0.074105	4.39879e-05	0.00140028	0	0	0.00131964	0.0508678	0.000549849	0.05765	0	0	0	0
Sst Chodl	0	0	0	0	0.00560938	0.0339127	0	0	0.0805711	0.14338	0	0	0.000509944	0.488611	0.00101989	0.0608746	0.00560938	0.142104	0	0	0	0	0.00203978	0.0786268	0.00152983	0.160398	0	0	0	0
VLMC	0	0	0	0	0.00657895	0.0397744	0	0	0.00657895	0.0117075	0	0	0	0	0	0	0.0394737	1	0	0	0	0	0	0	0	0	0	0	0	0
Vip	0	0	4.57834e-05	0.0395445	0.00611208	0.0369519	2.28917e-05	0.00862072	0.0202134	0.0359705	0	0	0	0	0.00041205	0.0245942	0.00114458	0.0289961	0	0	2.28917e-05	0.0383436	0.00135061	0.0520616	0.0008241	0.0864043	0	0	0	0
	0.000173943		0.00115777		0.165406		0.00265543		0.561942		0.000863787		0.00104366		0.0167539		0.0394737		0.0314136		0.000597015		0.0259425		0.00953772
